# Supplementary material
Source: JCI journal article supplement (doi:10.1172/jci150881)
Supplement: sd1 [file 1]

## Supplemental Data

### Supplemental Figures and Legends

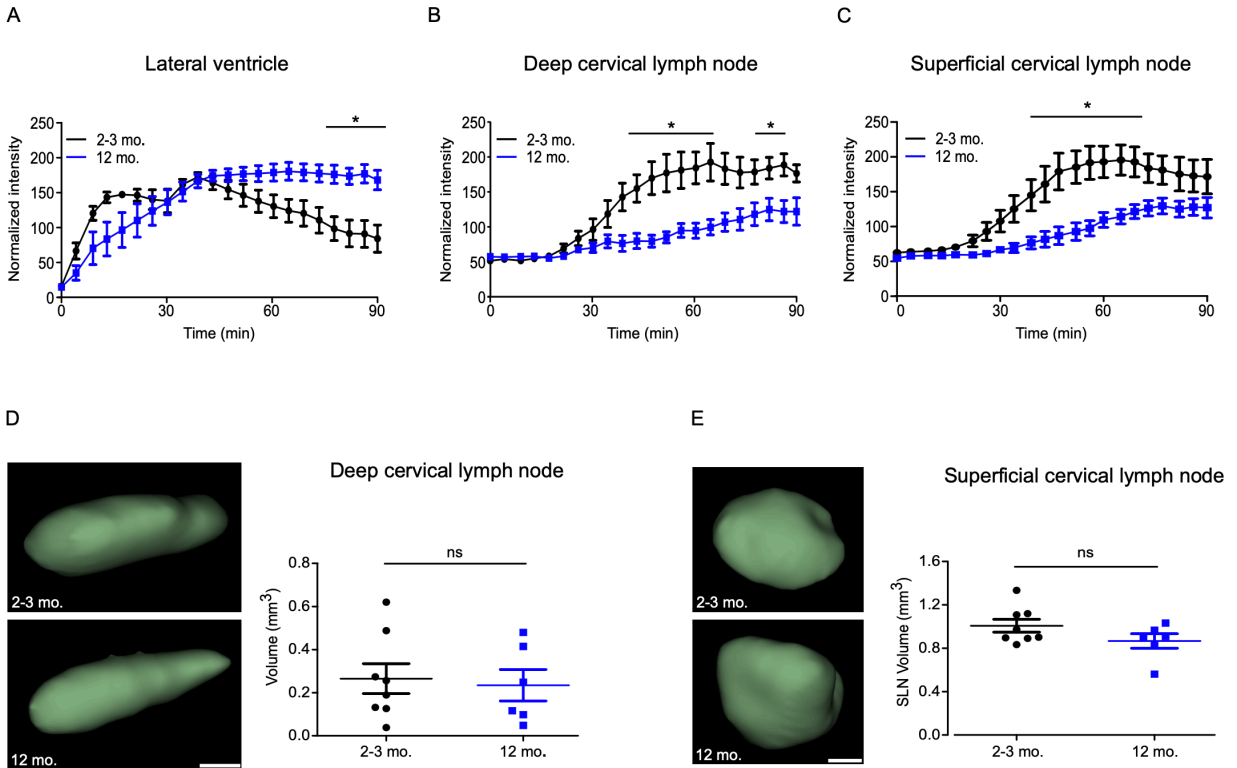

**Supplementary Figure 1: Normalized signal intensity values over time of lateral ventricle and cervical lymph nodes of CSF.** Signal intensity quantifications were made after low-rate intraventricular infusion ( $0.1 \mu\text{L}/\text{min}$ ) of a Gadospin D solution at 25 mM; data acquired with a series of T1-weighted MRI measurements in contralateral-ventricles (a), deep cervical lymph nodes (b) and superficial cervical lymph nodes (c). Actual signal intensity values were then normalized to a reference phantom. Quantifications of the different ROIs are expressed as the mean  $\pm$  SEM of  $n=7$  (2-3 months old mice) vs  $n=6$  (12 months old mice) and are representative of three independent experiments. \* $p<0.05$  (two-way ANOVA followed by Bonferroni's posthoc test). Representative images of 3D reconstruction and volume quantification of deep cervical (d) and superficial cervical (e) lymph nodes. Lymph node volumes of 2 and 12 month old mice were compared with two-tailed Student's t-test. Scale bars: 0.3 mm.

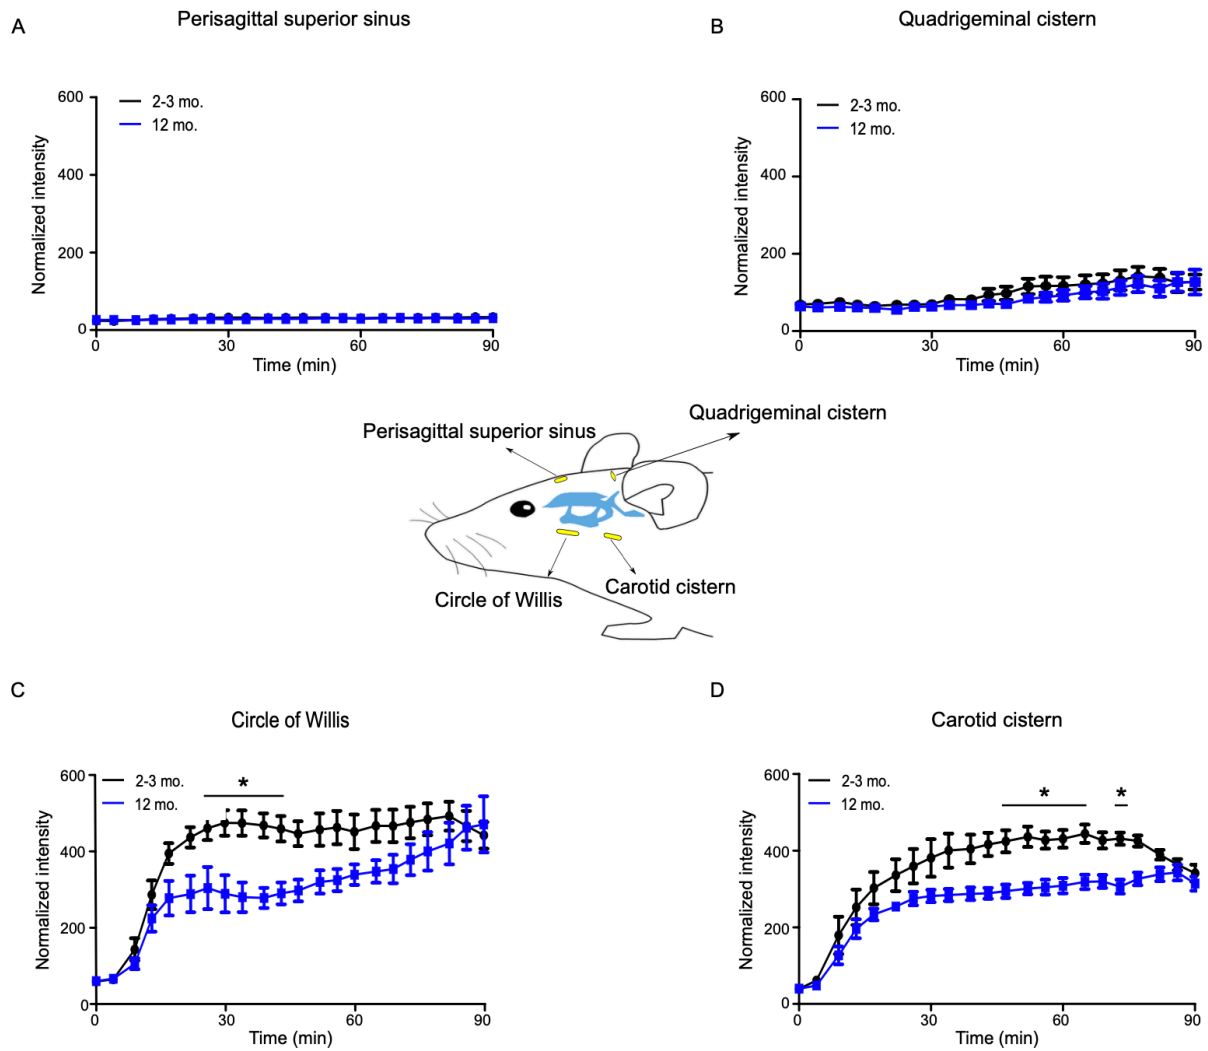

**Supplementary Figure 2: Normalized signal intensity values over time in the ventral and dorsal aspects of the skull.** Signal intensity quantifications were made after low-rate intraventricular infusion (0.1  $\mu\text{l}/\text{min}$ ) of a Gadospin D solution at 25 mM; data acquired with a series of T1-weighted MRI measurements at the perisagittal superior sinus (a), quadrigeminal cistern (b), Circle of Willis (c) and internal carotid cistern (d). Actual signal intensity values were then normalized to a reference phantom. Quantifications of the different ROIs are expressed as the mean  $\pm$  SEM of  $n=7$  (2-3 months old mice) vs  $n=6$  (12 months old mice) and are representative of three independent experiments. \* $p<0.05$  (two-way ANOVA followed by Bonferroni's posthoc test).

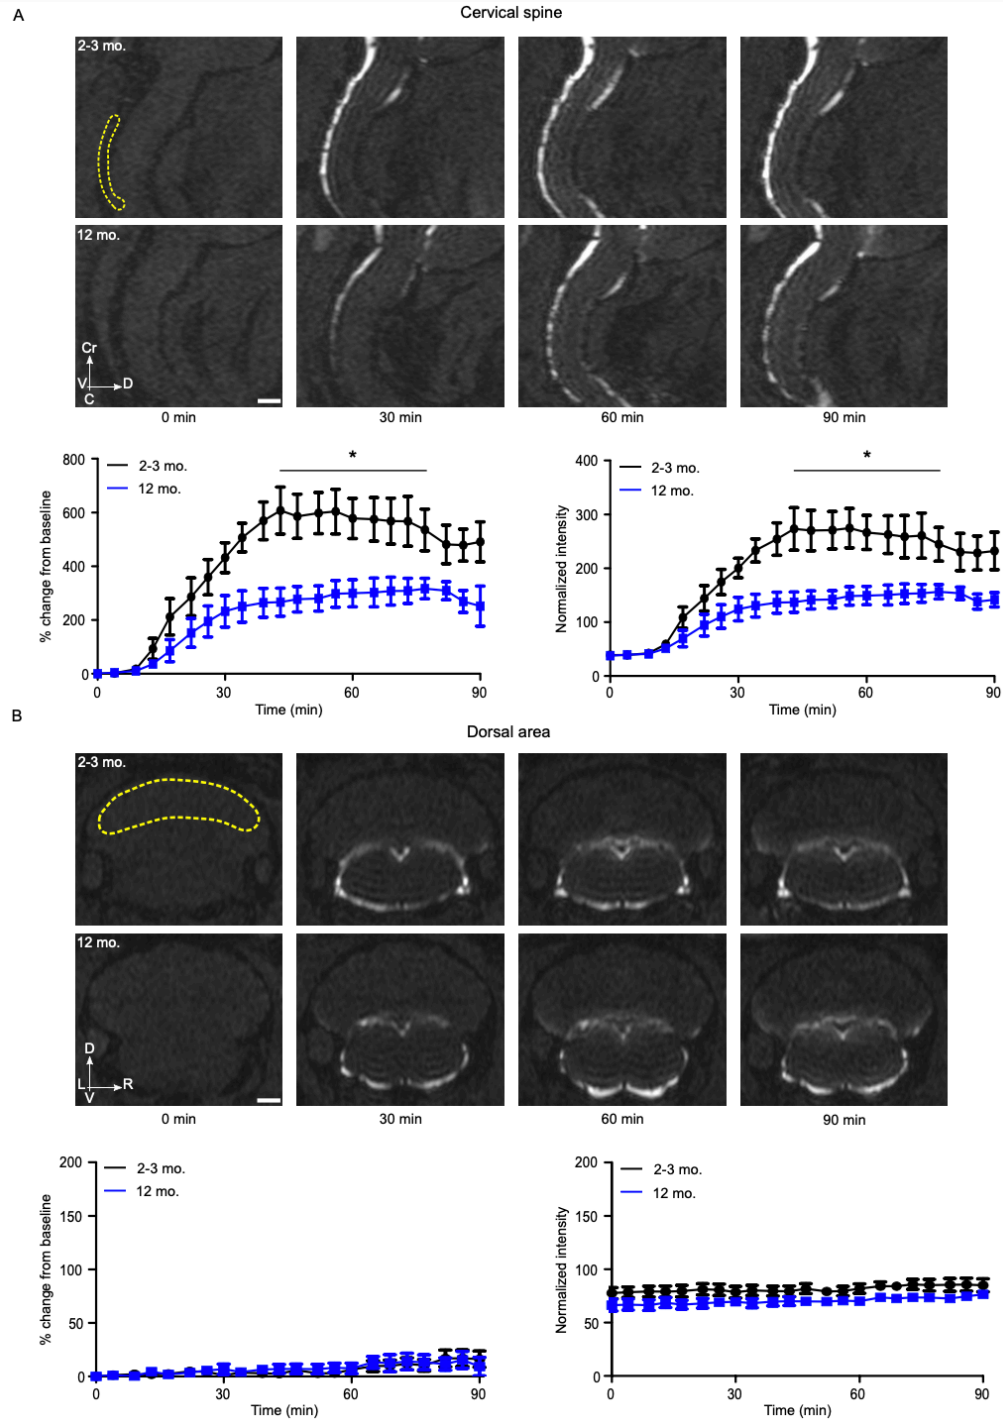

**Supplementary Figure 3: Assessment of distribution of CSF tracer to the spinal subarachnoid space and cortical parenchyma.** Visualization of tracer spread after low-rate intraventricular infusion ( $0.1 \mu\text{l}/\text{min}$ ) of a Gadospin D solution at  $25 \text{ mM}$ ; data acquired with a series of T1-weighted MRI measurements (3D time-of-flight gradient recalled echo sequence). **a** Signal dynamics of Gadospin D contrast agent at the ventral cervical spine in the sagittal plane in 2-3 months and 12 months old mice. **b** Signal dynamics of the dorsal cortex region in the coronal plane in 2-3 months and 12 months old mice. Quantifications of the different ROIs are expressed as the mean  $\pm$  SEM of  $n=7$  2-3 months old mice vs  $n=6$  12 months old mice and representative of three independent experiments. \* $p<0.05$  (two-way ANOVA followed by Bonferroni's posthoc test). Scale bars: 1 mm.

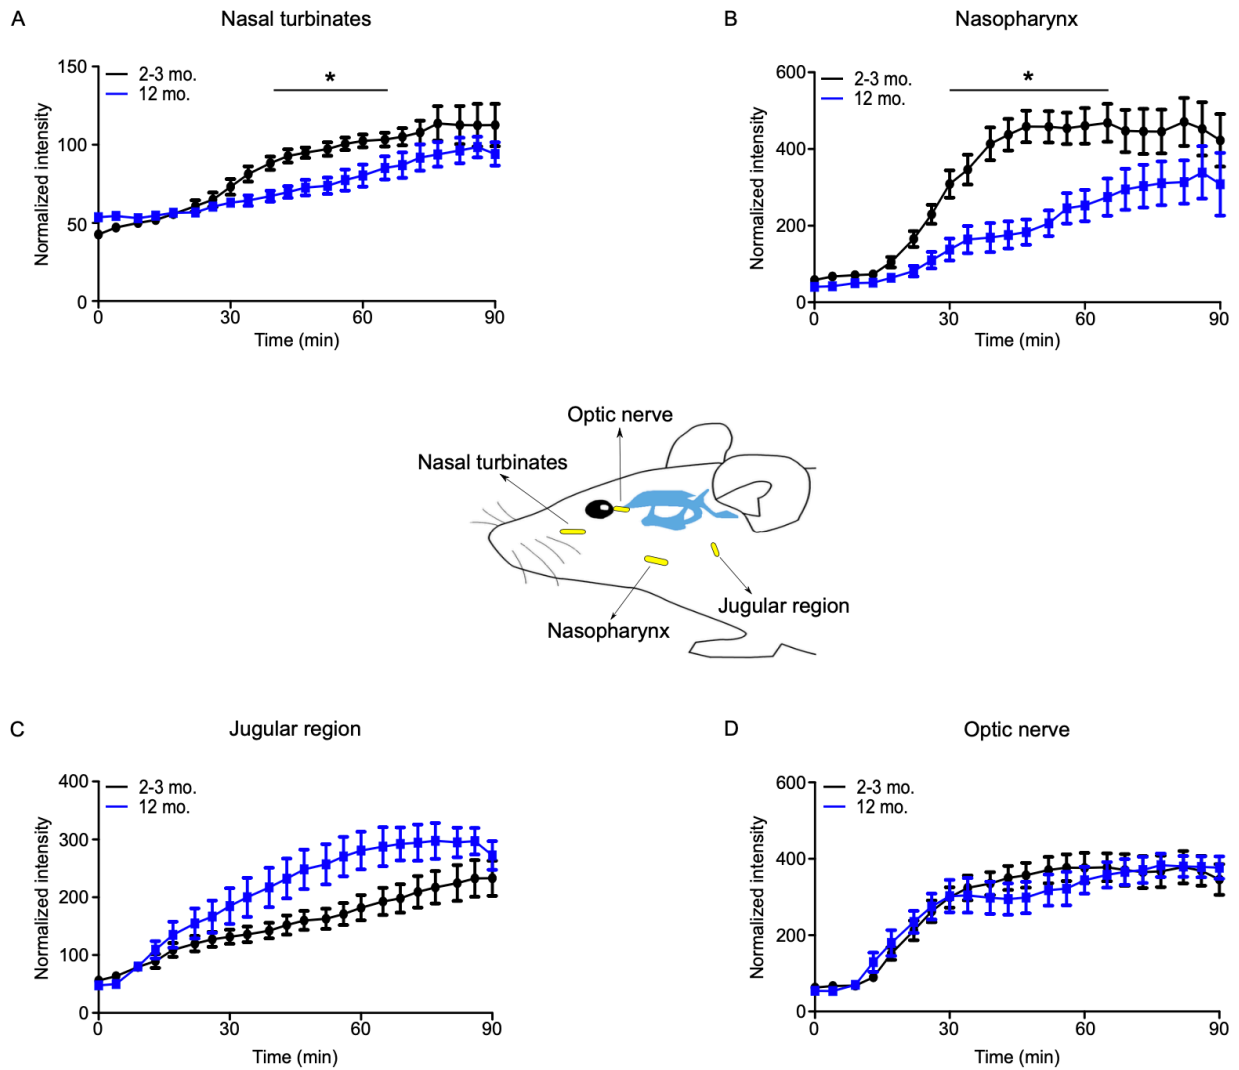

**Supplementary Figure 4: Normalized signal intensity values over time of potential CSF outflow sites from the skull.** Signal intensity quantifications were made after low-rate intraventricular infusion ( $0.1 \mu\text{L}/\text{min}$ ) of a Gadospin D solution at  $25 \text{ mM}$ ; data acquired with a series of T1-weighted MRI measurements in the nasal turbinates (a), nasopharynx (b), jugular region (c) and optic nerves (d). Actual signal intensity values were then normalized to a reference phantom. Quantifications of the different ROIs are expressed as the mean  $\pm$  SEM of  $n=7$  (2-3 months old mice) vs  $n=6$  (12 months old mice) and representative of three independent experiments. \* $p<0.05$  (two-way ANOVA followed by Bonferroni's posthoc test).

## Video Legend

**Video 1. MRI of CSF contrast agent efflux from the nasal region through lymphatic vessels to cervical lymph nodes following low-rate ventricular infusion.** Maximum-intensity projections video (representative of  $n = 7$  mice) showing the spread of tracer after low-rate intraventricular infusion ( $0.1 \mu\text{l}$  per min) of a Gadospin D solution at 25 mM gadolinium. Enhancement of the signal intensity in the ventricle is detectable at 4 min, in the nasal cavity at 17 min, and in the neck lymph nodes at 30 min. After 30 min, a continuous signal enhancement from the cribriform plate to the nasopharyngeal lymphatics to cervical lymph nodes is detectable. Images were acquired at 1 frame per 4 min 19 s.
